# Supplementary material for: Genomic Comparison of Escherichia coli O104:H4 Isolates from 2009 and 2011 Reveals Plasmid, and Prophage Heterogeneity, Including Shiga Toxin Encoding Phage stx2
Source: PLOS journal article supplement (doi:10.1371/journal.pone.0048228), 2012-11-01
Supplement: S5 (10.1371/journal.pone.0048228.s005) [file journal.pone.0048228.s005]

## Supplemental File S5

### Phage A (Black)

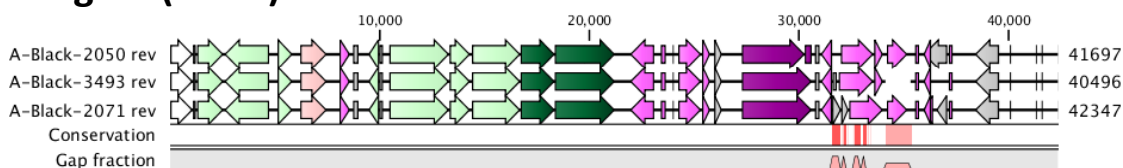

### Phages C/I (Grey/Purple)

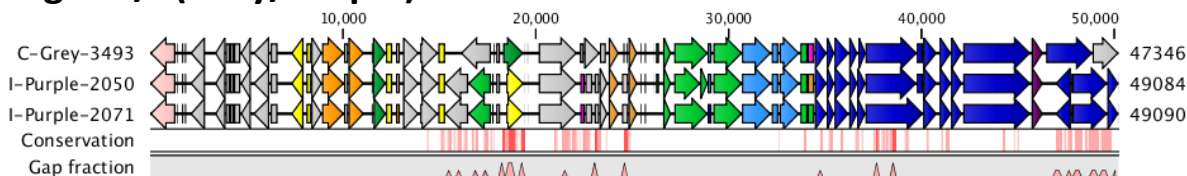

### Phage D (Orange)

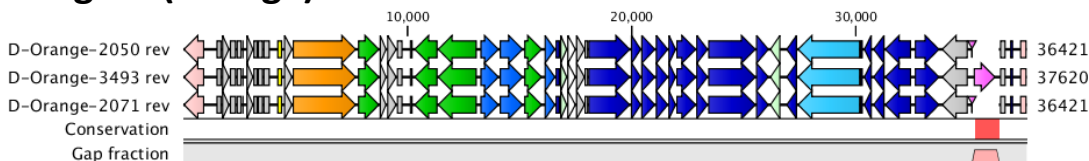

### Phage E (Green)

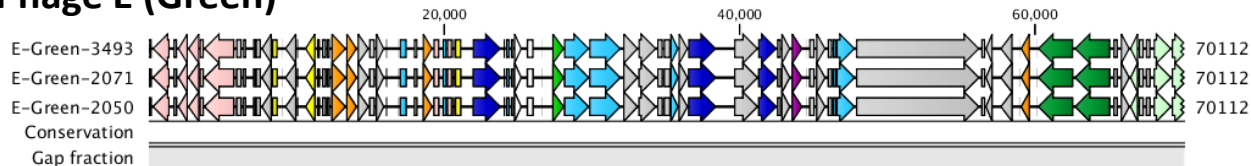

### Phage F (Blue)

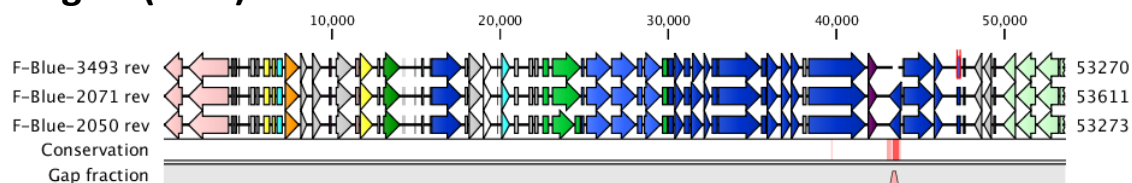

### Phage H (Yellow)

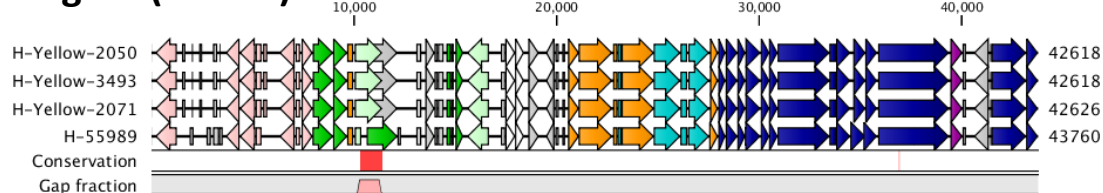

**Figure S5 – Alignment of individual prophage sequences.** Prophage sequences were aligned using the multiple alignment tool in CLC Bio. Divergent regions are indicated by red bars, while gaps are indicated by the line graph; the height of the line graph indicates the number of sequences that contain a gap.
